# Supplementary material
Source: Springer Nature journal article supplement (https://www.springermedizin.de/resource/supplementary/13063_2013_1937_MOESM2_ESM.pdf/9622002)
Supplement: MOESM2 [file 9622002]

**Table 2 Details of groups**

| <b>Group</b>                          | <b>Interventions</b>            | <b>acupoints</b>                                                                                                                                                                                | <b>Manipulation</b>                                                          |
|---------------------------------------|---------------------------------|-------------------------------------------------------------------------------------------------------------------------------------------------------------------------------------------------|------------------------------------------------------------------------------|
| Acupoint on disease-affected meridian | Acupuncture and basic treatment | Neiguan (PC6)<br>Tongli (HT5)                                                                                                                                                                   | Both points are punctured bilaterally, and punctured perpendicularly 2-4 cm  |
| Acupoint on non-affected meridian     | Acupuncture and basic treatment | Taiyuan(LU9)<br>Kongzui (LU6)                                                                                                                                                                   | Both points are punctured bilaterally, and punctured perpendicularly 2-4 cm. |
| Non-acupoint                          | Acupuncture and basic treatment | 1):On the front arm of deltoid muscle and Biceps brachi junction.<br>2):On the ulnar side of the arm, half way between the epicondylus medialis of the humerus and the ulnar side of the wrist. | Both points are punctured bilaterally, and punctured perpendicularly 3-5 cm. |
| Waiting-list                          | Basic treatment                 |                                                                                                                                                                                                 |                                                                              |
